1 RESEARCH

2 **Identifying Brain Network Topology Changes in Task Processes**  
3 **and Psychiatric Disorders**

4 **Paria Rezaeinia<sup>1</sup>, Kim Fairley<sup>2,3</sup>, Piya Pal<sup>1</sup>, François G. Meyer<sup>4</sup> & R. McKell Carter<sup>3,5,6</sup>**

5 <sup>1</sup>Department of Electrical and Computer Engineering, University of California San Diego, San Diego, U.S.A.

6 <sup>2</sup>Department of Economics, Leiden University, Leiden, The Netherlands

7 <sup>3</sup>Institute of Cognitive Science, University of Colorado Boulder, Boulder, U.S.A.

8 <sup>4</sup>Department of Applied Mathematics, University of Colorado Boulder, Boulder, U.S.A.

9 <sup>5</sup>Department of Electrical, Computer and Energy Engineering, University of Colorado Boulder, Boulder, U.S.A.

10 <sup>6</sup>Department of Psychology and Neuroscience, University of Colorado Boulder, Boulder, U.S.A.

11 **Keywords:** (fMRI, functional connectivity, random walk, hitting time)

---

**ABSTRACT**

12 A central goal in neuroscience is to understand how dynamic networks of neural activity produce effective  
13 representations of the world. Advances in the theory of graph measures raise the possibility of elucidating  
14 network topologies central to the construction of these representations. We leverage a result from the  
15 description of lollipop graphs to identify an iconic network topology in functional magnetic resonance  
16 imaging data and characterize changes to those networks during task performance and in populations  
17 diagnosed with psychiatric disorders. During task performance, we find that task-relevant subnetworks  
18 change topology, becoming more integrated by increasing connectivity throughout cortex. Analysis of  
19 resting-state connectivity in clinical populations shows a similar pattern of subnetwork topology changes;  
20 resting-scans becoming less default-like with more integrated sensory paths. The study of brain network  
21 topologies and their relationship to cognitive models of information processing raises new opportunities for  
22 understanding brain function and its disorders.

**AUTHOR SUMMARY**

23 Our mental lives are made up of a series of predictions about the world calculated by our brains. The  
24 calculations that produce these predictions are a result of how areas in our brain interact. Measures based  
25 on graph representations can make it clear what information can be combined and therefore help us better  
26 understand the computations the brain is performing. We make use of cutting-edge techniques that  
27 overcome a number of previous limitations to identify specific shapes in the functional brain network.  
28 These shapes are similar to hierarchical processing streams which play a fundamental role in cognitive  
29 neuroscience. The importance of these structures and the technique is highlighted by how they change  
30 under different task constraints and in individuals diagnosed with psychiatric disorders.

---

## INTRODUCTION

31 How do we link dynamic changes in functional brain structure to the processing of information? Brain  
32 activity organizes into stable networks that vary in strength and change with task demands Greicius,  
33 Krasnow, Reiss, and Menon (2003); Smith et al. (2009).

34 Because of its ease of implementation and relatively low cost, the analysis of resting functional magnetic  
35 resonance imaging (rfMRI) data Raichle et al. (2001) in particular has had a tremendous impact, leading to  
36 several large-scale public initiatives like the Human Connectome Project (HCP) Essen et al. (2013). One of  
37 the most promising methods used to study rfMRI activation has been to construct network models of  
38 functional connectivity between areas of the brain E. T. Bullmore and Bassett (2011); Goñi et al. (2014);  
39 van den Heuvel and Pol (2010). These models are characterized by network measures like efficiency  
40 Fornito, Zalesky, and Bullmore (2016) and have been applied to a wide variety of challenges including the  
41 study of psychiatric disorders (for review, see Avena-Koenigsberger, Misić, and Sporns (2017)). Improving  
42 our ability to interpret the meaning of these measures for brain processing would have tremendous impact.

43 To improve our ability to interpret network models of brain connectivity, we seek measures of topology  
44 that can be related to models of cognitive information processing. The study of the relationship between  
45 brain network topology and function has been accelerating and is key to explaining dynamic information  
46 processing in health and disease Stiso and Bassett (2018). To better understand how information is  
47 processed in a dynamic context, it is necessary to link specific brain-network topologies to cognitively  
48 meaningful information processing structures. Network analysis of brain data typically involves

49 descriptions of an inferred network. Here, we instead describe brain connections as stochastic processes (in  
50 our case, using a random walk), avoiding the constraints of a specific network model and instead describing  
51 general properties of brain functional connectivity in a given mental state. This improved description of  
52 brain connectivity can then be used to link results from graph theory to network topologies common in  
53 cognitive models of the brain. As a first step, we utilize a result from the theory of graph measures, which  
54 establishes that isolated chains of nodes produce maximally long random walks between points on the  
55 graph. In particular, a lollipop graph consists of a set of fully connected nodes attached to a chain of  
56 linearly-connected nodes. In a random walk on a lollipop graph, the number of hops required to reach the  
57 tail of the lollipop stick is greater than for other topological structures Brightwell and Winkler (1990). We  
58 target extremely long random walks between brain areas as a measure of the presence, and relative  
59 isolation, of linear chains of nodes. We note that this topology is similar to that found in hierarchical  
60 processing streams, a structure important in cognitive models. We hypothesize that those brain areas which  
61 take a long time to reach in a random walk are often situated in such an information processing topology.

62 We focus on the tails of random-walk network connectivity distributions to address the following four  
63 key questions. (i) How does the relative isolation of a linear chain of nodes change the distribution of  
64 connectivity in a synthetic network? (ii) Are there subnetworks in resting-state cortex that have properties  
65 similar to a linear chain of nodes? (iii) How are linear-chain subnetworks changed by task demands? (iv)  
66 Does the characterization of network topology have value in understanding and diagnosing psychiatric  
67 disorders?

## MATERIALS AND METHODS

### 68 *Hitting-time functional connectivity model*

69 One common approach to find the connectivity matrix of a brain network is to threshold the Pearson  
70 correlation matrix to obtain the adjacency matrix for the network. Although this method is very simple, it  
71 has some shortcomings that might cause inaccuracy in the results. One challenge is that the Pearson  
72 correlation coefficient does not account for latent variables, which might result in a high correlation among  
73 two regions that are not directly connected. In addition, the choice of threshold is arbitrary, creating  
74 interpretation and generalization issues. To overcome these challenges, we integrated the following changes  
75 into a standard network analysis pipeline for neuroimaging. First, to compensate for latent variables, we

76 use the partial correlation Smith et al. (2011) to find the connectivity matrix. Let  $\rho_{ij}$  represent the partial  
77 correlation between  $x_i$  and  $x_j$  (the BOLD time series associated with regions  $i$  and  $j$ , respectively).  
78 Therefore, we use a weighted brain functional network with adjacency matrix  $A = [\rho_{ij}]$ . The degree of  
79 node  $i$  is  $d_i = \sum_{j=1}^N |\rho_{ij}|$ . Second, we normalize edge strength using self loops that preserve the overall  
80 connectivity of each node relative to others. Third, we characterize the network using the hitting time, a  
81 random-walk measure that reflects the expected number of edges that need to be crossed to transition from  
82 one node to another. We next describe the edge strength and hitting time approaches in detail.

### 83 *Edge Strength Normalization*

84 For a random walk, the probability transition matrix is  $P = [p_{ij}]$ , where  $p_{ij}$  is defined as:

$$p_{ij} = \frac{|\rho_{ij}|}{\sum_{j=1}^N |\rho_{ij}|} = \frac{|\rho_{ij}|}{d_i} \quad (1)$$

85 The major drawback of this definition is that it fails to distinguish a strongly connected from a weakly  
86 connected node. Consider a network with 5 nodes (a, b, c, d, e) and 6 edges. Suppose that all edges  
87 connected to node a have weight 0.9. And, suppose that node b is connected to the same nodes as node a,  
88 but with edges with weight 0.1 (Fig. 1A). Applying equation (1), both nodes a and b will have the same  
89 transition probabilities, and therefore, the same relative connectivity.

90 To overcome this problem, we add a self loop to nodes with weaker connections. To implement this, we  
91 find the node with maximum degree in the network. For every other node, we subtract the degree of that  
92 node from the maximum degree and add that as a self edge to the node. Therefore, the new degree matrix is  
93  $D' = d_{max}I$ , and the new adjacency matrix is  $A' = [\rho'_{ij}]$ , where:

$$\begin{aligned} \rho'_{ij} &= \rho_{ij}, & i, j &= 1, \dots, N \text{ and } i \neq j, \\ \rho'_{ii} &= d_{max} - d_i, & i &= 1, \dots, N \end{aligned} \quad (2)$$

94  $d_{max} = \max_i(d_i)$ ,  $i = 1, \dots, N$  and  $I$  is the identity matrix.

### 95 *Hitting Time*

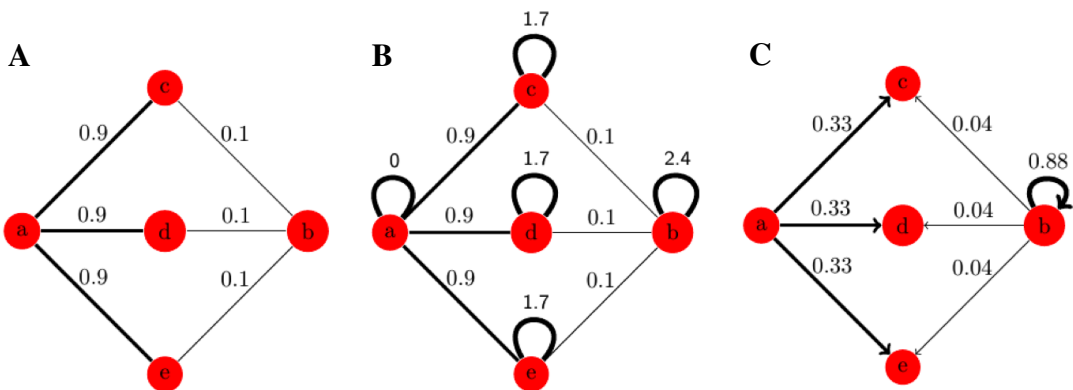

Figure 1: Edge strength normalization to maintain connectivity differences between a strongly connected and a weakly connected node. (A) A weighted graph with 5 nodes and 6 edges. (B) Adding self loops to nodes with weaker connections in order to normalize the probabilities. (C) Transition probabilities from nodes a and b after normalization (the transition probabilities from nodes c, d, and e are not included in this figure).

96 We run random walk models on the graph with the new transition probability matrix  $P' = D'^{-1}A'$  to  
 97 calculate the hitting time matrix  $H = [h_{ij}]$ .  $h_{ij}$ , the hitting time from node  $i$  to node  $j$  is the expected  
 98 number of hops to visit node  $j$  for the first time, for a random walk started at node  $i$ .

Hitting time is an asymmetric measure, meaning that  $h_{ij}$  and  $h_{ji}$  might be different. For example for a lollipop graph, the hitting times from the nodes on the complete component to nodes on the chain are much larger than the reverse direction, because a random walker spends more time in the complete component. We compute the hitting times between pairs of nodes using the graph-Laplacian method introduced in spectral graph theory Aldous and Fill (2002). This method is advantageous as it does not require the exact knowledge of the adjacency matrix, instead using a probabilistic approximation of the adjacency matrix of the network. Following Lovász and Simonovits (1993), we calculated the normalized graph Laplacian as:

$$\mathcal{L} = D'^{-1/2}(D' - A')D'^{-1/2} = I - P' \tag{3}$$

where,  $D'$  is the degree matrix and  $A'$  is the adjacency matrix of the graph after normalization as defined in the main text. We used the eigenvalues and eigenvectors of  $\mathcal{L}$  to calculate the hitting time matrix

$H = [h_{ij}]$  Lovász and Simonovits (1993);

$$h_{ij} = \sum_{k>1} \frac{d'}{\lambda_k} \left( \frac{\mu_{kj}^2}{d_j} - \frac{\mu_{ki}\mu_{kj}}{\sqrt{d_i d_j}} \right), \quad i, j = 1, \dots, N \text{ and } i \neq j \quad (4)$$
$$h_{ii} = 0, \quad i = 1, \dots, N$$

99 where,  $d'_i$  is the degree of node  $i$ ,  $i = 1, \dots, N$ , and  $d'$  is the sum of all degrees (after normalization, see  
100 main text).  $0 = \lambda_1 < \lambda_2 < \dots < \lambda_n$  are the  $n$  eigenvalues of  $\mathcal{L}$ , and  $\mu_{kj}$  is the  $j^{\text{th}}$  element of  $k^{\text{th}}$   
101 eigenvector of  $\mathcal{L}$  Lovász and Simonovits (1993).

102 Adding the self loops in the normalization step does not make the graphs reducible or periodic, meeting  
103 the requirements of the hitting time calculation we use here Norris (1997). Code for analysis in this project  
104 can be found under the first author's name on github: <https://github.com/SNaGLab>.

## RESULTS

105 To detect and characterize linear chains of nodes, we focus on the random-walk measure of connectivity  
106 hitting time Lovász and Simonovits (1993) defined above. In synthetic graphs and estimated networks, a  
107 node is a point in the graph (or area of the brain) and an edge is a connection between two nodes. Hitting  
108 time between nodes  $i$  and  $j$  is a random variable describing the number of steps to get from node  $i$  to node  
109  $j$  for the first time (represented as  $h_{ij}$ ) during a random walk, a measure equivalent to mean first-passage  
110 time Avena-Koenigsberger et al. (2017). Diffusion measures of networks, like hitting time, are becoming  
111 more commonly used and are the focus of active research Goñi et al. (2013); Lambiotte, Delvenne, and  
112 Barahona (2014); Shen and Meyer (2008). Diffusion-based measures carry significant methodological  
113 advantages. First, they overcome common issues caused when thresholding is used to define binary  
114 connections Goulas, Schaefer, and Margulies (2015); Reijneveld, Ponten, Berendse, and Stam (2007);  
115 Rubinov and Sporns (2011); Zalesky, Fornito, and Bullmore (2010). Second, they do not require perfect  
116 knowledge of the network to make a robust estimation of connectivity (i.e. it does not require the exact  
117 adjacency matrix Lovász and Simonovits (1993)). Third, measures like hitting time are asymmetric,  
118 meaning hitting time from one node to another may be different from the return trip, giving the best  
119 opportunity to identify extremeness in connectivity Lovász and Simonovits (1993). Here, we will use  
120 "hitting time" to refer to the expected number of edges to be traversed rather than the variable itself and

121 “hitting-time distribution” to be the subject-average distribution of the expected number of edges to be  
122 traversed when moving between combinations of nodes. We begin by looking at the relationship between  
123 extreme hitting times and synthetic graph structure and then extend those findings to a publicly available  
124 functional magnetic resonance imaging (fMRI) dataset.

125 **How does the relative isolation of a linear chain of nodes change the distribution of connectivity**  
126 **in a synthetic network?** We consider a chain of sequentially connected nodes as a model for a  
127 hierarchical processing stream. Formally, a chain of sequentially connected nodes can be described as  $N$   
128 nodes arranged in a line, so that there is an edge between nodes  $i$  and  $i + 1$  for  $i = 1, \dots, N - 1$ , and no  
129 edges between nodes  $i$  and  $j$  where,  $j \neq i - 1, i + 1$ . Theoretical results have found that a chain of  
130 sequentially-connected nodes attached to a fully-connected network (i.e. a lollipop graph) results in  
131 maximal hitting times when the chain is a third of the network Brightwell and Winkler (1990). We now  
132 compare the distribution of hitting times over nodes in a lollipop graph to small-world Watts and Strogatz  
133 (1998), random (Erdős-Rényi) Erdős and Rényi (1959), and complete synthetic graphs in Fig. 2. Each  
134 graph consists of 100 nodes. Random and small-world graphs are an average of 100 configurations. Linear  
135 chains of nodes result in larger hitting times which produce increased skewness in the hitting-time  
136 distribution. For example, in Fig. 2, panels A and D represent two extreme examples of hitting-time  
137 distribution in a network. Due to the presence of a path in A, the hitting time has a long tail (non-zero  
138 probability) that extends to large values (above 120,000). While in D each node is fully connected to every  
139 other node and hence, hitting time is the same across all pairs (in this case, 100) and the distribution is a  
140 single value with no tail. We focus on Kelley skewness Kelley (1923), as our measure of skewness because  
141 it directly compares the tails of the distribution. Kelley skewness (hereafter just skewness) therefore  
142 provides a more robust separation of extreme cases from changes in the interior of the distribution.

143 Although perfectly isolated linear chains of nodes produce extreme hitting times, it is possible that even  
144 weak connections to the chain might significantly reduce hitting times to nodes on the chain. To  
145 characterize changes in the hitting-time distribution when a linear chain of nodes is not perfectly isolated,  
146 we begin with a random graph and alter its connectivity to isolate a linear chain of nodes (Fig. 3).  
147 Beginning with 50 nodes, edges of weight 1 were added between each pair of nodes with a probability of  
148 0.6. We then randomly chose 10 connected nodes in the graph (1/5 of the graph) and reduced the weight of  
149 edges between those connected nodes and the rest of the network by 0.05 for 19 iterations. This process

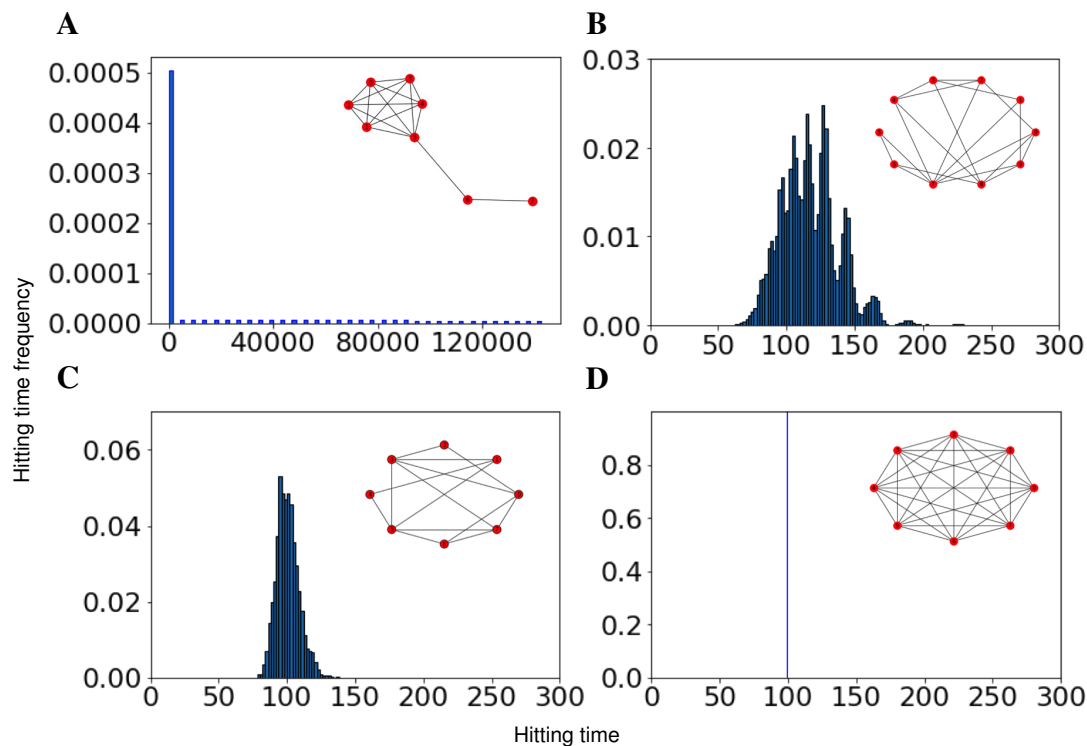

Figure 2: Hierarchical processing streams in lollipop graphs produce extremely long hitting times. Hitting-time distributions for (A) lollipop, (B) small world, (C) random and (D) complete graphs with 100 nodes (averaged over 100 runs for small world and random networks). The graphs on top of the distributions are smaller representations of the graphs used to generate the distributions. Axis scales change significantly with graph type (e.g. lollipop hitting time is several orders of magnitude larger than the other graphs).

150 created a linear subgraph that becomes progressively more isolated until it resembles the stick of a lollipop  
151 graph. As a control for reduced connectivity across the network as a whole, we took the same graph we  
152 started with above and reduced all existing edge weights by 0.05 for 19 iterations. To preserve the  
153 reduction in overall connectivity (edge weights are typically normalized by the total connectivity of a node)  
154 edge weight reductions were added back as self loops (see Materials and Methods). These self loops are  
155 required as part of the random-walk to preserve the physiological principle that reduced neuronal activity  
156 would result in a reduction of connectivity (not just a shift between connections).

157 Average hitting time increases as the chain of nodes becomes more isolated but also when the graph  
158 becomes more disconnected as a whole. Hence, mean hitting time does not distinguish between these two



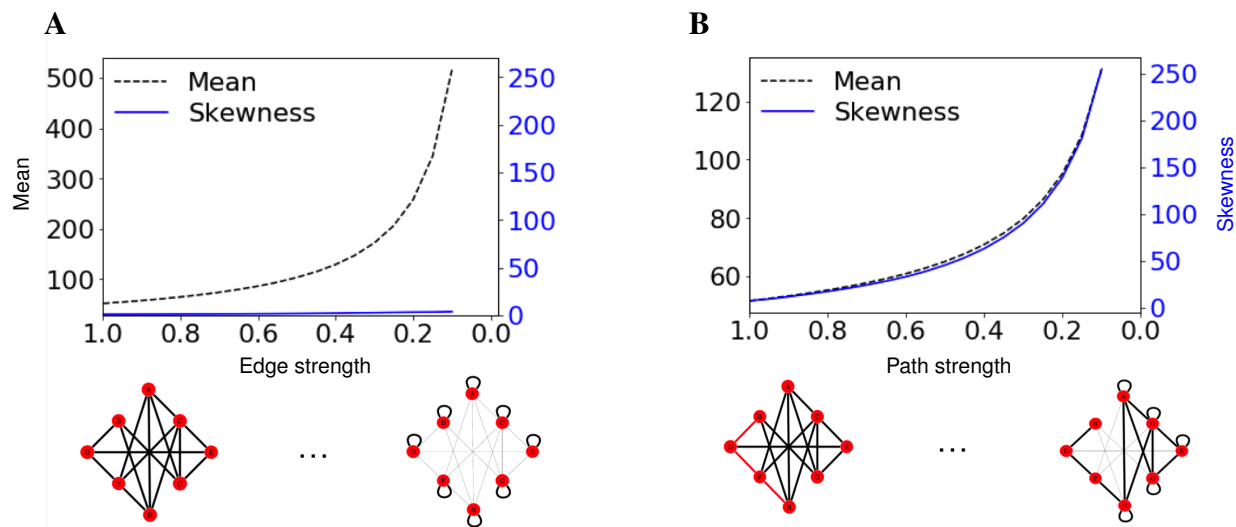

Figure 3: The skewness of the hitting-time distribution distinguishes a reduction of overall connectivity from a subgraph that becomes more linear. (A) Mean and skewness of hitting-time distribution as the strength of all connections is reduced by 0.05 for 19 iterations. Toy networks for this transition are represented on the x-axis. Reductions in connectivity are added as self loops. (B) Mean and skewness of hitting-time distribution as the strength of connections between linear component and the rest of the graph is reduced by 0.05 for 19 iterations. Toy networks on the x-axis represent synthetic graphs with a linear subgraph as the path (red) is made more linear.

159 scenarios. However, in our simulations, skewness changed significantly as the linear subgraph becomes  
 160 more isolated but only minimally when the average connectivity of the whole graph decreased. Skewness  
 161 also increased with the relative isolation of the chain of nodes but was present even when each node in the  
 162 chain was somewhat connected to the rest of the graph (Fig. 3).

163 We have shown that a lollipop component present in a graph results in significant increase of (Kelley)  
 164 skewness of hitting-time distribution but is this relationship true in heterogeneous topologies? It is  
 165 important to note that other changes in graph structure may also result in extreme hitting times. One  
 166 commonly employed graph measure is modularity, the extent to which the graph can be easily separated  
 167 into different communities.

168 To evaluate the effect of modularity on hitting-time distribution, we have tested a large number of  
 169 networks with different levels of Louvain modularity and numbers of chain motifs (3 node linear

170 components). We generated random networks each with 100 nodes varying the number of edges. To allow  
171 a comparison across a given number of edges, we generated multiple graphs with the same number of  
172 edges by choosing  $k$  edges uniformly from the full possible set of edges.  $k$  was varied from 200 to 1000 in  
173 intervals of 50 and 1000 to 2500 in intervals of 100. The range of the average degree is  $[4, 50]$ , with a range  
174 of Louvain modularity of  $[\cdot 1, \cdot 6]$ . Keeping only those graphs that were connected resulted in 15,243 graphs  
175 for comparison. Using a linear model, we sought to explain skewness as a function of modularity, number  
176 of edges, and number of chain motifs. Number of edges ( $p < .001, t(15241) = 4.16, \beta = -.0052$ ),  
177 modularity ( $p < .001, t(15241) = 37.4, \beta = 239$ ), and the number of chain motifs  
178 ( $p < .001, t(15241) = 13.8, \beta = 9.5$ ) all independently explain some variance in skewness. In the  
179 remaining analysis of brain networks, we therefore test whether or not nodes with extreme hitting times  
180 also become less chain like.

181 **Are there subnetworks in resting-state cortex that have properties similar to a linear chain of**  
182 **nodes?** Motivated by the above simulations, we utilized the skewness of the hitting-time distribution to  
183 identify potential linear chains of nodes in cortical connectivity data. The brain is made up of a large  
184 number of highly interconnected regions Cherniak (1990) evolved to efficiently integrate a variety of  
185 sources of information Friston (2010) that can be represented as a network. Graph-theoretic models of the  
186 brain have been used to effectively segment commonly associated regions of the brain into large-scale  
187 networks and describe the properties of brain information processing (for review see E. Bullmore and  
188 Sporns (2009)) in health and disorder Bassett and Sporns (2017); Fox and Greicius (2010).  
189 Characterizations of brain network changes in development or psychiatric disorder often utilize graph  
190 measures like efficiency Latora and Marchiori (2001) and small-worldness Watts and Strogatz (1998),  
191 which typically include the average path length in their definition (for common measurement descriptions,  
192 see Achard and Bullmore (2007)). Even measures that may not directly utilize the average path length (e.g.  
193 modularity Newman and Girvan (2004); Stiso and Bassett (2018)) sometimes rely on community detection  
194 methods that incorporate the average path length. The use of an average path-length rests on the  
195 assumption that path lengths in that network are normally distributed and so can lead to the  
196 mischaracterization of the topology of the network. The concern arises because of the use of an average  
197 and is present in both traditional and diffusion-based graph measures. Overcoming this assumption requires  
198 the use of specific subnetwork models (for example, see Khambhati, Medaglia, Karuza, Thompson-Schill,

199 and Bassett (2018)) or the capture of deviations from normality in the path-length distribution. Here, we  
200 use Kelley skewness of the hitting-time distribution to distinguish changes in the network as a whole from  
201 the presence of network topologies resembling hierarchical processing streams.

202 To test for the presence of skewness in cortical connectivity, we generated a hitting-time measure of  
203 connectivity (see materials and methods) for resting-state functional data from neurotypical participants  
204 who were part of a large open-source dataset (LA5c, UCLA Consortium for Neuropsychiatric Phenomics  
205 Poldrack et al. (2016), see supporting information). Network nodes were 180 anatomical regions from the  
206 multi-modal parcellation of Glasser et al. Glasser et al. (2016). The average hitting-time distribution of  
207 neurotypical resting-state functional connectivity is positively skewed (Kelley skewness of 15.04 and  
208 Pearson's coefficient of skewness of 2.3), Fig.4A. A D'Agostino-Pearson test Trujillo-Ortiz and  
209 Hernandez-Walls (2003) showed that as a whole the hitting times were not normally distributed  
( $Z(skew) = 110, 3496, \chi^2(2) = 17864.8071, p < 0.001$ ).

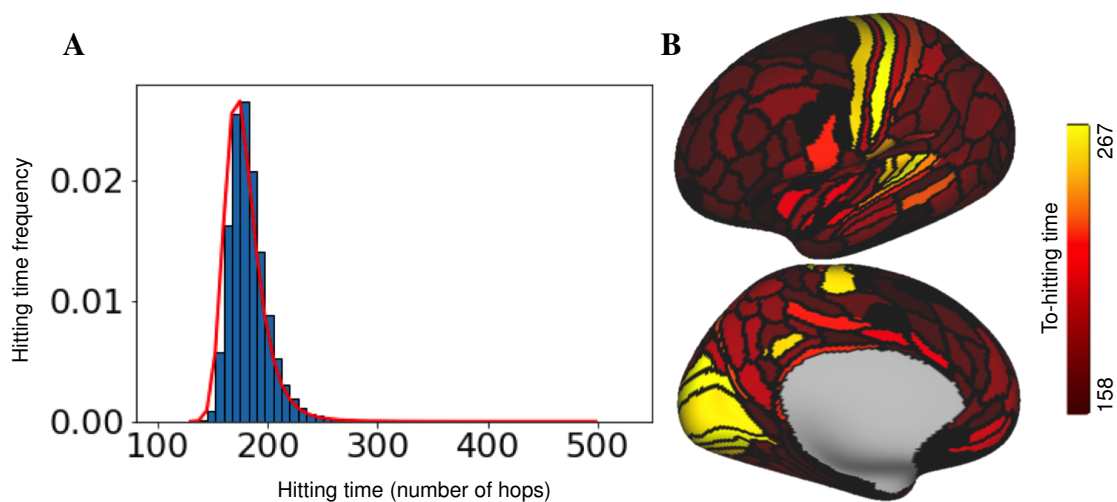

**Figure 4:** Hitting-time measures of resting-state functional connectivity in neurotypical participants are positively skewed. (A) Average normalized hitting-time distribution for control subjects during resting-state from the publicly available LA5c study. (B) Average to-hitting time from all other regions of cortex for lateral (top) and medial (bottom) left maps thresholded to [158(10%), 267(95%)]. The range of data is [129, 310]. Primary auditory, visual, and somatosensory cortices have the largest to-hitting times in the cortex.

211 Although skewness of a distribution can originate from many sources, ranging from a smooth shift of the  
212 distribution as a whole to far ranging outliers, the particular skewness measure used here (Kelley skewness)  
213 directly compares the extremes of the distribution (90% compared to 10%), limiting the potential causes of  
214 the skewness. Limiting our test for skewness to the tails of the distribution is consistent with our aim of  
215 identifying changes in linear-chain topologies, which have been shown to produce maximal hitting times in  
216 lollipop networks (see above). The primary auditory, visual, and somatosensory hierarchies, show the  
217 largest average to-hitting times (Fig. 4B), and are therefore possibly related to chain-like network  
218 topologies. It is important to note that even the use of a Kelley skewness metric does not guarantee the  
219 presence of chain-like network topologies. In fact, random graphs generated from a stochastic block model  
220 that precluded chain-like topologies exhibited Kelley skewness explained by modularity and node degree.  
221 We generated 100 graphs with 180 nodes from a stochastic block model. To define groups and mixing  
222 structure, we fixed the probability of connections within communities to be ( $p = 0.7$ ) and between  
223 communities to be ( $q = 0.1$ ). To expand the range of possible modularity, we randomly picked the number  
224 of nodes in each community until we reach 180 (if the total number of nodes passes 180, we reduce the size  
225 of the last community to have a total of 180 nodes in the graph). After removing the null values, we ended  
226 up with 89 graphs with number of communities from 2 to 6 and Louvain modularity levels of 0.03 to 0.42.  
227 These SBM models contain Kelley skewness which is explained by both modularity  
228 ( $\beta = -1.591e + 03, t(86) = -10.76, p < 0.001$ ) and degree  
229 ( $\beta = -8.617e - 02, t(86) = -7.39, p < 0.001$ ). Because Kelley skewness may arise from multiple  
230 sources, we next look for changes in the skewness of the hitting-time distribution during a task and ask  
231 whether those changes are related to regions of the brain with the largest hitting times during resting scans,  
232 and then, whether those areas with the largest rest hitting times also become less chain-like.

233 **How are linear-chain subnetworks changed by task demands?** To better interpret the skewness of  
234 cortical networks during resting-state fMRI, we sought to test whether hitting times become more or less  
235 skewed during task performance and which connectivity changes underlie those shifts. We compared  
236 resting-state and balloon analogue risk task (BART) functional connectivity from the LA5c study. The  
237 BART is a paradigm designed to study risk taking in an experimental setting. Participants in the BART  
238 decide whether or not to pump a balloon that is at risk of popping. The BART is defined by visual input  
239 and motor responses without structured auditory stimulation.

240 Hitting times between cortical areas were calculated for fMRI data collected during the performance of  
241 the BART task using the same processing pipeline as for the resting-state scans. To test for differences in  
242 skewness, we then ran a linear mixed effect model (lme in R) of skewness of the hitting-time distributions  
243 (dependent variable) modeling task (with resting-state as a reference), gender, and age as independent  
244 variables. The task variable was treated as a random effect (BART and resting-state points were paired by  
245 participant), which characterizes idiosyncratic variation that is due to individual differences. In our first  
246 model, we found significant difference in skewness for control subjects between BART and rest  
247 ( $\beta = -10.25, t(118) = 0.79, p < 0.001$ ), see Fig. 5. The skewness of hitting-time distribution is  
248 significantly reduced in the BART ( $\mu = 5.48, \sigma = 3.96$ ) compared to rest ( $\mu = 15.73, \sigma = 8.49$ ). Age and  
249 gender did not significantly explain variance in this model. We next sought to test whether this skewness  
250 could be related to nodes with extreme hitting times and whether those nodes define network topologies  
251 that become less chain-like.

252 To identify those nodes related to differences between rest and task, we first ask which nodes had the  
253 largest hitting-time changes. The ten regions with the largest hitting-time changes (paired t-tests comparing  
254 task and rest hitting times, significantly different with  $p < 0.05$ , Bonferroni corrected) are 'V2', 'V3', 'V4',  
255 'V3A' and 'PGs' within the visual cortex, '1', '4', '3b' and 'OP4' within somatosensory cortex, and the  
256 area 'PF', Fig. 5B-D. Regions are labeled according to Glasser et al. (2016). These nodes, which show  
257 decreased hitting times during task performance, overlap heavily with the visual and motor processing  
258 streams and correspond to many of the nodes with the largest hitting times during rest scans. This reduction  
259 in hitting time in the visual and motor pathways during the BART provides support for the role of these  
260 pathways in skewness but does not address whether differences in the chain-like topology is responsible for  
261 the change in hitting times.

262 To add support for the role of chain-like topologies in large hitting times in brain data, we calculated a  
263 chain-index for each node that provides a measure of how similar to an isolated chain the local connectivity  
264 of the node is. For every node in the network located on a three node chain motif, we define a chain index  
265 by focusing on its two strongest connections. A node is located on a chain motif if its neighbors with the  
266 two strongest connections are stronger than the remaining connections and if the two strongest connections  
267 have a significantly weaker connection with each other. Assuming that node  $i$  is on a chain motif and has

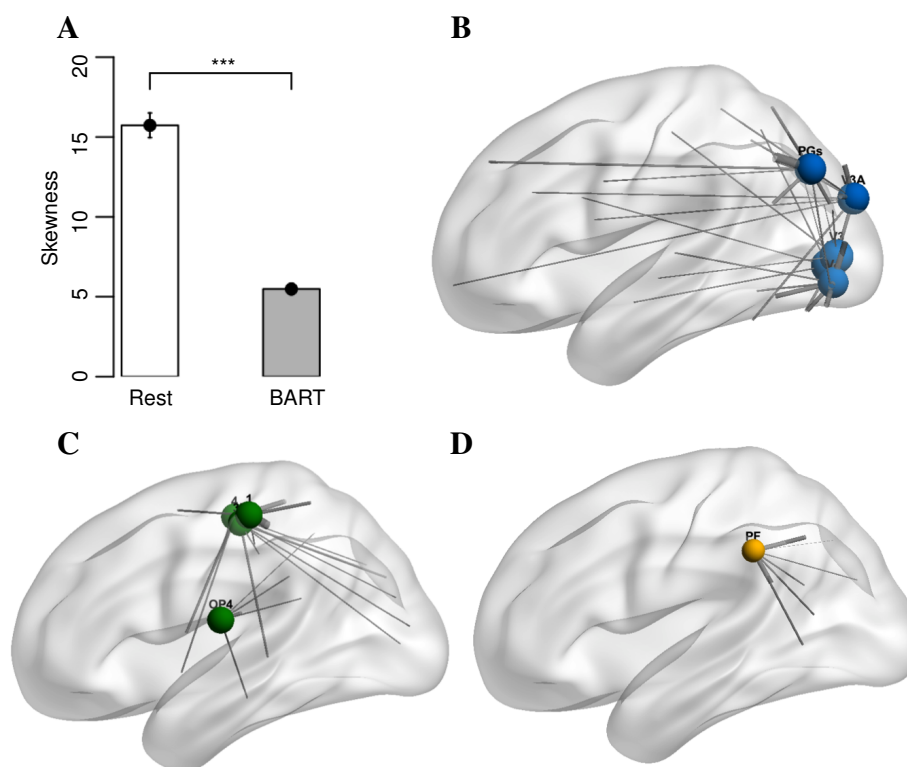

**Figure 5:** The distribution of skewness vs. task for control subjects. p-values significance codes: . = 0.1, \* =< 0.05, \*\* =< 0.01, \*\*\* =< 0.001. The skewness of hitting-time distribution for control subjects is significantly smaller when the subjects are engaged in BART task compared to rest. The 10 nodes with largest hitting time changes are (B) V2, V3, V4, V3A and PGs (visual), (C) 1, 4, 3b and OP4 (motor) and (D) PF. The size of each node represents the magnitude of difference of average to-hitting times (range from 19 to 30.2) and thickness of each edge represents the magnitude of difference of partial correlation in BART compared to rest.

268  $N_i$  neighbors and nodes  $i_1$  and  $i_2$  have the strongest connections to node  $i$ , we define chain index for node  $i$   
 269 as:

270 
$$\zeta_i = \rho_{ii_1} + \rho_{ii_2} - \sum_{j=3}^{N_i} \rho_{ii_j}$$

271 If a node is located on a perfect chain, the chain index will be at its maximum. If a node has equal  
 272 connections to every other node in the network (the least chain-like network), the chain index will be a  
 273 large negative number that depends on the number of nodes in the network.

274 Comparing connectivity during the BART to rest, the largest reductions in the chain index were for a set  
275 of nodes that overlapped heavily with those nodes with the largest hitting time (8 of the 10 nodes described  
276 above), including 'V2', 'V3', 'V3A', 'V6' and 'V6A' within the visual cortex, '1', '4', '3b' and 'OP4'  
277 within somatosensory cortex, and the area 'PF'. Labels are according to Glasser et al. (2016). In  
278 accordance, the nodes with the largest hitting-time changes also show increased connectivity during the  
279 BART. Connections from nodes with the largest hitting times that have changed significantly (paired t-tests  
280 comparing connections from each node during task and rest,  $p < 0.05$  Bonferroni corrected) are indicated  
281 in Fig. 5 by gray lines, with the thickness of the line indicating the size of the change. During task  
282 performance, nodes in task-related sensory streams (which have large hitting times during rest) have  
283 smaller hitting times, becoming less like isolated chains and instead more widely integrated.

284 **Does the characterization of network topology have value in understanding and diagnosing**  
285 **psychiatric disorders?** Brain network efficiency, which is commonly defined by the mean distance  
286 between nodes, has been shown to change in disorders such as Alzheimer's Dennis and Thompson (2014),  
287 schizophrenia Besnard et al. (2018); Li et al. (2017), and others Cheng et al. (2016). Reductions in  
288 measures of efficiency that utilize mean distance could be due to: 1. Reduced overall connectivity; or, 2.  
289 Subnetwork changes that lead to skewed hitting-time distributions. As described in Fig. 3, we can  
290 distinguish these possibilities by focusing on skewness. If skewness changes, the differences between  
291 psychiatric populations and controls is more likely to be due to subnetwork changes than a change in over  
292 all connectivity. We ran an ordinary least squares regression model with skewness of the resting-state  
293 hitting-time distribution as the dependent variable, and group (dummy coded, reference controls), gender  
294 (dummy coded, reference females), and age (mean centered, linear) as independent variables. We analyzed  
295 resting-state functional data from four patient groups, control, schizophrenia, bipolar and attention deficit  
296 hyperactivity disorder (ADHD). We found significant differences in skewness between schizophrenia and  
297 control populations ( $\beta = -5.130, t(252) = 1.268, p < 0.001$ ), bipolar and control populations  
298 ( $\beta = -4.060, t(252) = 1.324, p < 0.001$ ), and a trend-level difference between ADHD patients and  
299 control populations ( $\beta = -2.445, t(252) = 1.324, p = 0.066$ ), see Fig. 6. Gender and age did not  
300 significantly explain variance in this model.

301 To identify those nodes related to skewness differences between schizophrenia, bipolar disorder, and  
302 controls, we first ask which nodes had the largest hitting-time changes. The ten regions with the largest

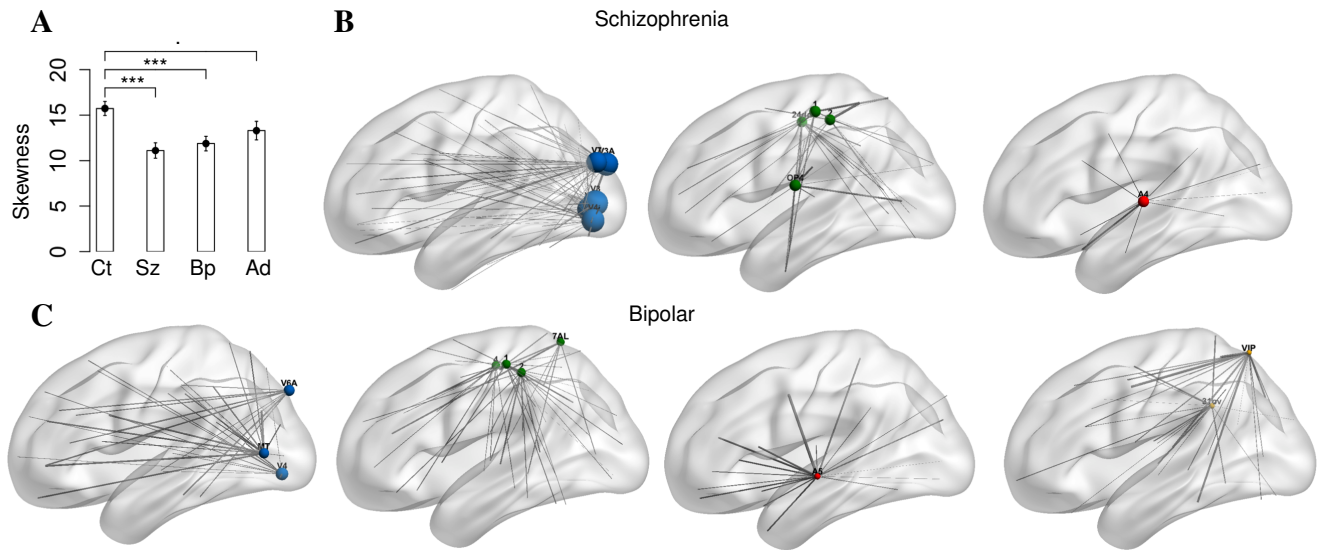

**Figure 6:** Skewness of the hitting-time distribution is significantly different across patient groups. (A) Distribution of skewness of the hitting-time distributions in patient and control groups during resting-state scans. Ct, Sz, Bp and Ad stand for control, schizophrenia, bipolar and ADHD, respectively. Significance codes: . = 0.1, \* = < 0.05, \*\* = < 0.01, \*\*\* = < 0.001. The skewness of hitting-time distribution is significantly smaller for subjects with schizophrenia and bipolar disorders compared to neurotypicals. The 10 nodes with the largest change in hitting time for subjects with schizophrenia include V2, V3, V4, V3A and V7 (visual, top blue), 1, 2, 24dd and 4 (motor, top green) and A4 (auditory, top red). The 10 nodes with largest change of hitting time for subjects with bipolar include MT, V4, V3A and V6A (visual, bottom blue), 1, 2, 4 and 7AL (motor, bottom green), A5 (auditory, bottom red) and VIP and 31pv (bottom yellow). The size of each node represents the magnitude of difference of average to-hitting times (range from 7.1 to 33.4) and thickness of each edge represents the magnitude of difference of partial correlation in psychiatric disorder compared to control subjects during rest.

303 hitting-time changes between (t-tests comparing schizophrenia and control groups for each region,  
 304 significantly different with  $p < 0.05$  Bonferroni corrected) were 'V2', 'V3', 'V4', 'V3A' and 'V7' within  
 305 the visual cortex, '1', '2', '4' and '24dd' within somatosensory cortex and 'A4' within the auditory cortex  
 306 for subjects with schizophrenia. For subjects with bipolar disorder, the ten regions with the largest  
 307 hitting-time changes (significantly different in t-tests comparing bipolar and control groups with  $p < 0.05$   
 308 Bonferroni corrected) were 'MT', 'V4', 'V3A' and 'V6A' within visual cortex, '1', '2', '4' and '7AL'  
 309 within somatosensory cortex, 'A5' within auditory cortex and 'VIP' and '31pv'. Regions are labeled



310 according to Glasser et al. (2016). Connections that have changed significantly (t-tests comparing  
311 connections from each node between groups,  $p < 0.05$  Bonferroni corrected) from these nodes are  
312 indicated by gray lines with the thickness of the line indicating the size of the change.

313 We find evidence that individuals with schizophrenia and bipolar disorder have less skewed hitting-time  
314 distributions than controls during resting-state fMRI. The regions of cortex with the largest hitting-time  
315 reductions between patient and control populations are in sensory/motor cortex and overlap with many of  
316 the same regions that have extremely large to-hitting times during rest in controls. It is possible that the  
317 large hitting-time values found in these regions of the cortex are related to the theoretical finding that  
318 linear-chains of nodes produce maximal hitting times and that a reduction in hitting time in these regions  
319 occurs when the nodes are part of a topology that is less chain like. We therefore also compared the chain  
320 index for schizophrenia, bipolar and control groups. The ten regions with the largest changes of chain index  
321 (t-tests comparing schizophrenia and control groups for each region, significantly different with  $p < 0.05$   
322 Bonferroni corrected) are 'V2', 'V3', 'V4', 'V3A' and 'V7' within the visual cortex, '1', 'OP4' and '24dd'  
323 within somatosensory cortex and 'A4' and 'A5' within the auditory cortex for subjects with schizophrenia.  
324 For subjects with bipolar disorder, the ten regions with the largest changes of chain index (significantly  
325 different in t-tests comparing bipolar and control groups with  $p < 0.05$  Bonferroni corrected) are 'V4',  
326 'V3A' and 'V6A' within visual cortex, '1', '2', '4' and '7AL' within somatosensory cortex, 'A5' within  
327 auditory cortex and 'VIP' and 'PFcm'. The convergence of evidence of changes in extreme hitting-time  
328 values in sensory areas of cortex and those same areas being connected in a less chain-like topology in  
329 schizophrenia and bipolar disorder is consistent with our hypothesis that path-length changes in these  
330 populations are likely to be related to sub-network topology shifts and not changes the network on average.

## DISCUSSION

331 We have presented evidence that the skewness of connectivity in cortical brain networks can be used to  
332 infer likely network topology changes that improve our understanding of information processing in the  
333 brain. Using random graphs we showed that the isolation of linear motifs is one prominent cause of  
334 skewness in hitting time even in the presence of mixed topologies. We then showed that skewness, but not  
335 average of brain-connectivity distributions is related to psychiatric diagnosis. We confirmed that these  
336 differences in skewness were related to a linear-chain topology by testing for changes in a chain index. In

337 networks for which connectivity is positively skewed, a change in subnetwork topology (and possibly a  
338 different brain state) is a more parsimonious explanation than changes in average connectivity. These  
339 topology changes are focused in sensory areas of the brain and when compared to changes brought about  
340 during task performance, provide an initial mechanistic link between resting-state connectivity changes and  
341 clinical diagnosis.

342 Extremely large hitting times can be linked to linear chain topologies through theoretical work showing  
343 that lollipop networks result in maximal hitting times Brightwell and Winkler (1990). We have shown  
344 using a toy problem that the extremeness of hitting-time values scales with how isolated a linear chain of  
345 nodes is and that the presence of chain motifs is related to extreme hitting-time values even in random  
346 networks with mixed topologies above and beyond modularity of the network. Resting brain networks also  
347 have extreme hitting times that are likely related to hierarchical processing in sensory cortex. When they  
348 are most isolated from the rest of the network, hierarchical processing streams, resemble the chain of nodes  
349 on the linear component of a lollipop graph. This parallel motivates the use of extremely long random  
350 walks between brain areas as a measure of the presence, and relative isolation, of hierarchical processing  
351 streams. In particular, hitting time of a region of interest can be utilized to detect presence of linear  
352 components likely to be hierarchical processing streams. A central dogma of neuroscience is that sensory  
353 representations are constructed hierarchically Hubel and Wiese (1962); Kikuchi, Horwitz, and Mishkin  
354 (2010); Van Essen and Maunsell (1983). Hierarchical processing streams have also been a focal component  
355 of computer vision models since 1971 Giebel (1971) and a significant contributor to the success of modern  
356 convolutional neural networks LeCun, Bengio, and Hinton (2015). Their foundational nature has made the  
357 study of hierarchical processing streams the focus of targeted analyses (e.g. Sepulcre, Sabuncu, Yeo, Liu,  
358 and Johnson (2012)). Here, we showed that nodes from sensory and motor areas of the brain have extreme  
359 hitting times which contribute to Kelley skewness. By comparing resting to task-based network topologies,  
360 we can show that decreases in hitting time are also associated with sensory hierarchies becoming less chain  
361 like.

362 Task changes in functional connectivity can be observed as changes in functional brain network topology.  
363 Previous work has highlighted the central role of path length and the integration of isolated paths in  
364 function. In Goni et al. Goñi et al. (2014), a notion of path transitivity – which accounted not only for the  
365 shortest path, but also local detours along that path – was the best predictor of functional connectivity.

366 Similar notions of distributed communicability (related to the diffusion of information over the network)  
367 were used to quantify the disruption of the global communication in the cortex that was triggered by the  
368 pharmacogenetic inactivation of the amygdala Grayson et al. (2016), and to detect changes in functional  
369 connectivity after a stroke Crofts et al. (2011). A thorough review of these concepts and their relationships  
370 to the notion of mean first-passage time, which is equivalent to the mean hitting time, is provided in  
371 Avena-Koenigsberger et al. Avena-Koenigsberger et al. (2017). Because the mean hitting time conflates  
372 overall changes in connectivity with changes to a subnetwork, these changes may be better explained using  
373 Kelley skewness, which specifically focuses on extreme values and so provides a mechanism to identify  
374 potential subnetwork changes. Extreme values contributing to connectivity skewness were associated with  
375 sensory areas of the brain specifically associated with the task. Hitting times in these sensory areas of the  
376 brain became shorter and less extreme during BART task performance. Sensory areas became more  
377 strongly connected to distant areas throughout the brain. The nodes with the largest reductions in hitting  
378 time were found in brain sensory areas related to the BART task (somatosensory and visual areas). One  
379 additional area also showed a decrease in hitting time, PF. PF is located in the inferior parietal lobule and is  
380 thought to be related to risk processing Weber and Huettel (2008). In line with its role in the processing of  
381 visual magnitude, it showed increased connectivity with visual inputs. Broadly, the introduction of a task  
382 caused sensory processing streams to become better connected to other task relevant areas, and less  
383 chain-like. This result is somewhat counterintuitive since hierarchical processing pipelines are often  
384 described as most distinct when active. We do find evidence of increased connectivity within sensory  
385 networks but these increases in strength within the sensory processing stream are offset by wider  
386 integration making their network topology less chain like. In addition, whether the processing pipeline  
387 becomes more or less integrated depends on the calculation underlying the transition probability between  
388 areas. When similar models are constructed using the raw correlation values, group and task differences in  
389 the same data set are consistent but in the opposite direction Rezaeinia and Carter (2017). This is likely due  
390 to the redundant connections and task event correlations Cole et al. (2018) included in raw correlation  
391 models. Here, we focused on the partial correlation of brain-region time-series which minimizes redundant  
392 connections, following the state-of-the-art in the field Smith et al. (2011). In spite of the complexities  
393 raised, the distribution of task relevant information throughout the brain is consistent with what would be  
394 most likely to improve BART task performance and supports the interpretation of sensory hierarchies as  
395 existing as relatively isolated linear networks topologies during rest. In future work it would be helpful to

396 incorporate additional multifaceted tasks to generalize these findings to the incorporation of sensory  
397 information under other constraints.

398 Skewness of the connectivity distribution also explains cortical-network differences between psychiatric  
399 diagnoses. Resting functional connectivity in a large neurotypical population is significantly positively  
400 skewed. In such a case, average efficiency for such a network would be biased and less representative of the  
401 network as a whole. An important finding is that changes in connectivity between clinical and control  
402 populations are due to changes in skewness rather than average differences. In fact, the median of  
403 connectivity measures changed in the opposite direction with respect to the average. Network connectivity  
404 changes between clinical and control populations are therefore due to a subset of connections rather than  
405 the network as a whole. The identification of specific cortical regions involved in topological changes  
406 between neurotypical and clinical populations provides an opportunity to better understand functional  
407 changes that occur in those populations as well as opportunities for improving diagnosis. Task performance  
408 reduced hitting-time skewness by increasing the connectivity between sensory areas and the rest of the  
409 cortical network. Qualitatively similar changes are seen in clinical populations, implying further work  
410 exploring network topology changes to specific tasks may help characterize the atypical resting  
411 connectivity for individuals with a schizophrenia or bipolar diagnosis. A testable prediction from this  
412 implied mechanistic difference would be that individuals with these diagnoses spend less time in activities  
413 typically associated with resting fMRI (e.g. future planning).

414 The results presented were based on theoretical predictions and applied to a publicly available dataset in  
415 a rigorous manner. We would like to document the following caveats and qualifications. First, although  
416 linear components in networks produce maximal hitting times in theory, it is possible that other network  
417 topologies could also produce some degree of skewness. To answer this concern, we showed that in toy  
418 examples skewness was related to short linear graphs or linear graphs that were still connected to the rest of  
419 the graph. We also found that the hitting-time distribution of both small-world, lollipop, and random graphs  
420 are skewed but that skewness in both cases is dominated by linear paths, even with a linear-path that  
421 comprises significantly less than a third of the graph. It is, however, important to note that the number of  
422 linear topologies does not explain all of the variance in Kelley skewness and so there could be other  
423 contributing topologies, perhaps related to modularity and degree. In our human fMRI analyses, the  
424 network as a whole, did not become less connected (see supplementary materials) and those areas with

425 extreme values become less chain-like when they have smaller hitting times. Thus, the relationship  
426 between extreme hitting times and linear paths is robust. In addition, past work on sensory hierarchies  
427 Hubel and Wiese (1962); Kikuchi et al. (2010); Van Essen and Maunsell (1983), recent work showing  
428 parallels between convolutional neural networks and sensory networks Güçlü and van Gerven (2015); Kell,  
429 Yamins, Shook, Norman-Haignere, and McDermott (2018); Khaligh-Razavi and Kriegeskorte (2014), and  
430 the integration of sensory networks during task performance (see above) are all consistent with the  
431 presence of linear components in the cortical network. Second, we focused on a cortical model of brain  
432 function and the absence of subcortical nodes could have affected the topology of the network model.  
433 However, the inclusion of subcortical connections to cortical network endpoints should not change  
434 connectivity measures since the path would still produce larger hitting times (the largest times may then be  
435 shifted to the middle of the sensory hierarchy).

## CONCLUSION

436 In conclusion, establishing a link between network topologies, hierarchical processing pipelines, task  
437 engagement, and psychiatric disorders provides an opportunity to interpret cortical network changes in the  
438 light of cognitive models of brain function. The interpretation of network connectivity and information  
439 processing topologies is an area of significant focus for neuroscience Fornito and Bullmore (2015). The  
440 widespread collection of rfMRI in particular provides a unique opportunity to extend this work to numerous  
441 psychiatric disorders and compare these findings with the growing body of open-source fMRI task data.

## SUPPORTIVE INFORMATION

### 442 *Data.*

443 We used the functional magnetic resonance imaging (fMRI) data from the LA5c Study Poldrack et al.  
444 (2016), collected by the UCLA Consortium for Neuropsychiatric Phenomics (CNP), which is funded by the  
445 NIH Roadmap Initiative. This data was obtained from the OpenfMRI database. Its accession number is  
446 ds000030. The dataset is formatted according to the Brain Imaging Data Structure K. J. Gorgolewski et al.  
447 (2016) (BIDS) standard. This study contains neuroimaging data from 290 participants. We ended up with a  
448 sample number of 255 subjects after removing subjects with missing functional measurements. In this  
449 sample, there are 119 healthy individuals (labeled as control), 49 individuals diagnosed with schizophrenia,

450 48 individuals diagnosed with bipolar disorder and lastly 39 individuals diagnosed with attention deficit  
451 hyperactivity disorder (ADHD). The focus of the LA5c Study is to understand memory and cognitive  
452 functional structures across patient groups. Therefore, the data set includes resting-state fMRI data as well  
453 as fMRI data collected during several different tasks. In this paper we focus on the analysis of resting-state  
454 and balloon analogue risk task (BART) fMRI data for the four specified groups. We focused on the BART  
455 because it has reliable visual input which has been shown to produce large-scale changes in sensory  
456 cortical hierarchies, which could be compared to the internally-driven resting-state network. In addition,  
457 we develop variants of the BART and so we have expertise with the task and any findings would have local  
458 applications. We obtained the preprocessed data which is de-identified, motion corrected and coregistered  
459 to Montreal Neurological Institute (MNI) standard space K. Gorgolewski, Durnez, and Poldrack (2017).  
460 We used FSL Jenkinson, Beckmann, Behrens, Woolrich, and Smith (2012); Smith et al. (2004) to correct  
461 for motion and apply a high-pass filter to remove low-frequency noise (cut-off frequency of 100 seconds).  
462 The data also includes potential confound regressors K. Gorgolewski et al. (2017). In order to remove the  
463 effect of motion artifacts, we used the 36-parameter motion regression technique introduced in Satter et al.  
464 Satterthwaite et al. (2013), which has been shown to be most effective in decoupling modular structure  
465 from subject motion Ciric et al. (2017).

#### 466 *Parcellation.*

467 The fMRI data has the following parameters; the matrix consists of  $64 \times 64$  voxels for 34 slices recorded  
468 with a TR of 2 seconds. In total, there are 147 time samples for resting-state data and 267 time samples for  
469 BART data. To extract a reliable cortical network for each participant, we reduced the number of nodes by  
470 averaging over voxels within an anatomical region. We used the multi-modal parcellation developed by  
471 Glasser, et al. Glasser et al. (2016) to map the fMRI data into a more sparse decomposition framework.  
472 There are 180 regions in each hemisphere, which increase the neuroanatomical precision for studying the  
473 structural and functional organization. This parcellation is based on multiple neurobiological properties,  
474 connectivity, functional and architecture, which improves the consistency across subjects.

#### HITTING TIME VS. DEGREE DISTRIBUTION

475 To compare the ability of hitting time and degree distributions to distinguish the presence of linear  
476 components, we generated a random graph with  $N = 50$  nodes in which a connection between each node

477 randomly occurred with  $p = 0.6$ . We then attached a linear component of length 1 to the graph and kept  
478 increasing its length by 1 for 20 iterations (Fig. 7A). Skewness of the hitting-time distribution increases as  
479 we increase the length of linear component (Fig. 7B, blue/solid). The skewness of degree distribution  
480 remains close to constant (Fig. 7B, black/dashed). The change in other features of degree distribution such  
481 as mean or median do not reliably reflect the linear component either. Depending on the relative size of  
482 network and linear component, we might observe change in the degree distribution, but it is not consistent  
and is not most closely related to the presence of linear components.

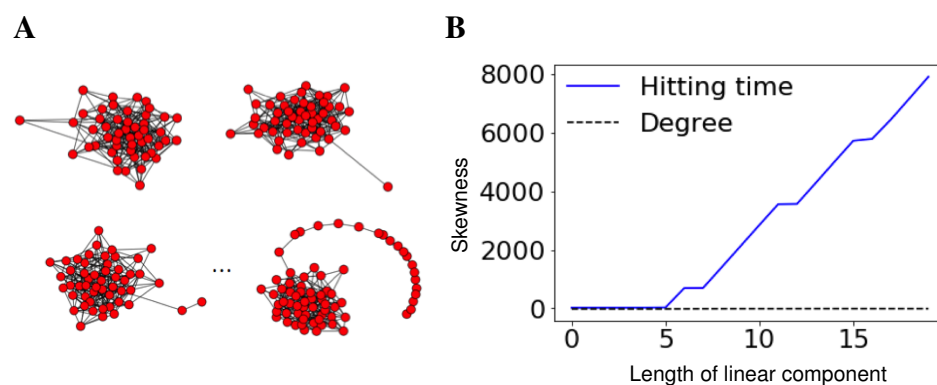

Figure 7: The hitting-time distribution of a graph becomes more skewed as the length of a linear subgraph increases. (A) We started with a random graph with 50 nodes, added a linear component of length 1 and increased the length of the linear component by 1 for 20 iterations. (B) Skewness of the hitting-time distribution increased significantly as the length of linear component increased. The degree distribution does not demonstrate a consistent relationship with linear path length.

483

## MEAN AND MEDIAN OF HITTING-TIME DISTRIBUTION

484 *Effect of task on mean and median of hitting-time distribution.*

485 Aligned with the tests for skewness, we seek the effect of task on mean and median of hitting-time  
486 distribution. We ran a linear mixed effect model by adding a random effect for participant (BART and  
487 resting-state points were paired by participant). We found that mean of hitting-time distribution is  
488 significantly smaller for BART compared to rest ( $\beta = -1.6, t(118) = 0.13, p < 0.001$ ).

489 Finally, a linear mixed effects model on the median of hitting times reveals a significant positive effect of  
490 BART vs. rest, ( $\beta = 1.3, t(118) = 0.16, p < 0.001$ ), Fig. 8.

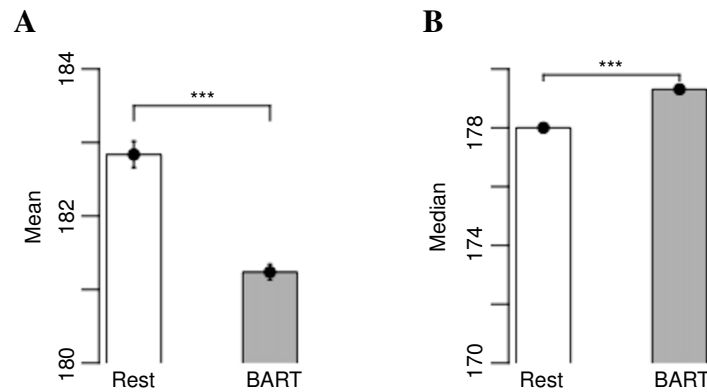

Figure 8: The distribution of (A) mean and (B) median vs. task for control subjects. p-values significance codes: . = 0.1, \* = < 0.05, \*\* = < 0.01, \*\*\* = < 0.001.

491 *Effect of psychiatric disorders on mean and median of hitting-time distribution.*

492 To test the effect of psychiatric disorders on the average efficiency, we run an ordinary least squares  
493 regression model with mean of hitting-time distribution as the dependent variable. The independent  
494 variables are group (coded as a dummy variable with the control group as the reference group), gender  
495 (coded as a dummy variable with the female gender acted as the reference category) and age (mean  
496 centered, linear). We found significant differences between schizophrenia versus control  
497 ( $\beta = -1.113, t(252) = 0.255, p < 0.001$ ), bipolar versus control  
498 ( $\beta = -1.064, t(252) = 0.252, p < 0.001$ ) and ADHD patients versus control  
499 ( $\beta = -0.835, t(252) = 0.266, p = 0.002$ ). The qualitative results are similar to skewness, but the  
500 coefficients are approximately one quarter the magnitude of those in the model explaining skewness.  
501 Finally, if we run a similar model with the median of the resting-state hitting-time distribution as the  
502 dependent variable, we only find a trend toward significance between schizophrenia and control in the  
503 opposite direction ( $\beta = 0.473, t(252) = 0.244, p = 0.054$ ). Hierarchical sensory processing streams  
504 identified above as those with the longest hitting times show the largest changes between control and  
505 diagnosed groups, Fig. (9).

ACKNOWLEDGMENTS



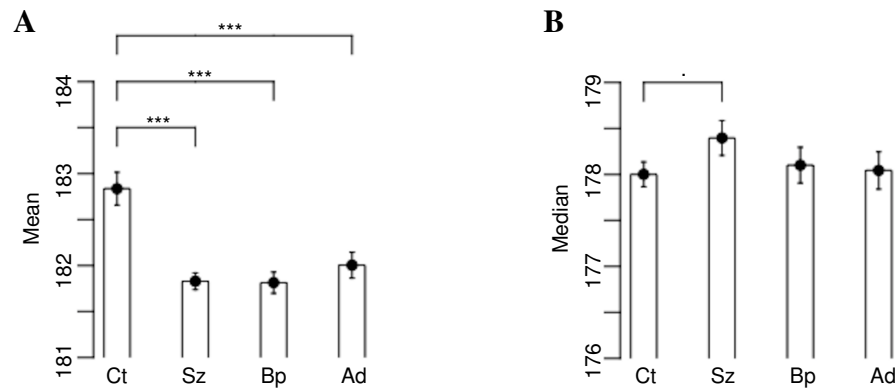

Figure 9: Mean of hitting-time distribution is significantly different across patient groups. Distribution (A) mean and (B) median of the hitting-time distribution in patient and control groups during resting-state scans. p-values significance codes: . = 0.1, \* = < 0.05, \*\* = < 0.01, \* \* \* = < 0.001.

506 Publication of this article was funded by the University of Colorado Boulder Libraries Open Access Fund.  
507 The research was supported by the Department of Electrical and Computer Engineering, University of  
508 California San Diego, and Department of Electrical, Computer and Energy Engineering and Institute of  
509 Cognitive Science of the University of Colorado Boulder. Piya Pal was supported in parts by NSF NCS-FO  
510 1734940 and UC San Diego. We would also like to acknowledge members of Social Neuroscience and  
511 Games (SNaG) Lab, and Psychology and Neuroscience Department at the University of Colorado Boulder  
512 whose comments helped us improve our work. We would like to especially thank Heejung Jung, John  
513 Pearson, Terry Sejnowski, and David Smith for manuscript review during its preparation.

514

515

## REFERENCES

516

517 Achard, S., & Bullmore, E. (2007). Efficiency and cost of economical brain functional networks. *PLoS computational biology*,  
518 3(2), e17.

519 Aldous, D., & Fill, J. (2002). *Reversible markov chains and random walks on graphs*.

520 <https://www.stat.berkeley.edu/~aldous/RWG/book.html>. Berkeley.

521 Avena-Koenigsberger, A., Misisic, B., & Sporns, O. (2017). Communication dynamics in complex brain networks. *Nature*

522 *Reviews Neuroscience*, 19, 17 EP -. Retrieved from <http://dx.doi.org/10.1038/nrn.2017.149>

523 Bassett, D. S., & Sporns, O. (2017). Network neuroscience. *Nature Neuroscience*, 20, 353 EP -. Retrieved from

524 <http://dx.doi.org/10.1038/nn.4502>

525 Besnard, J. L., Bassett, D. S., Smallwood, J., Margulies, D. S., Derntl, B., Gruber, O., ... Bzdok, D. (2018). Different shades  
526 of default mode disturbance in schizophrenia: Subnodal covariance estimation in structure and function. *Human Brain*

527 *Mapping*, 39(2), 644-661. Retrieved from

528 <https://onlinelibrary.wiley.com/doi/abs/10.1002/hbm.23870> doi: 10.1002/hbm.23870

529 Brightwell, G., & Winkler, P. (1990). Maximum hitting time for random walks on graphs. *Random Structures & Algorithms*,

530 1(3), 263-276. Retrieved from

531 <https://onlinelibrary.wiley.com/doi/abs/10.1002/rsa.3240010303> doi:

532 10.1002/rsa.3240010303

533 Bullmore, E., & Sporns, O. (2009). Complex brain networks: graph theoretical analysis of structural and functional systems.

534 *Nature reviews. Neuroscience*, 10(3), 186.

535 Bullmore, E. T., & Bassett, D. S. (2011). Brain graphs: Graphical models of the human brain connectome. *Annual Review of*

536 *Clinical Psychology*, 7(1), 113-140. Retrieved from

537 <https://doi.org/10.1146/annurev-clinpsy-040510-143934> (PMID: 21128784) doi:

538 10.1146/annurev-clinpsy-040510-143934

- 539 Cheng, W., Rolls, E., Zhang, J., Sheng, W., Ma, L., Wan, L., ... Feng, J. (2016). Functional connectivity decreases in autism  
540 in emotion, self, and face circuits identified by knowledge-based enrichment analysis. , 148.
- 541 Cherniak, C. (1990). The bounded brain: Toward quantitative neuroanatomy. *Journal of cognitive neuroscience*, 2(1), 58–68.
- 542 Ciric, R., Wolf, D. H., Power, J. D., Roalf, D. R., Baum, G. L., Ruparel, K., ... Satterthwaite, T. D. (2017). Benchmarking of  
543 participant-level confound regression strategies for the control of motion artifact in studies of functional connectivity.  
544 *Neuroimage*, 154, 174–187. doi: 10.1016/j.neuroimage.2017.03.020
- 545 Cole, M. W., Ito, T., Schultz, D., Mill, R., Chen, R., & Cocuzza, C. (2018). Task activations produce spurious but systematic  
546 inflation of task functional connectivity estimates. *bioRxiv*. Retrieved from  
547 <https://www.biorxiv.org/content/early/2018/10/10/292045> doi: 10.1101/292045
- 548 Crofts, J. J., Higham, D. J., Bosnell, R., Jbabdi, S., Matthews, P. M., Behrens, T. E. J., & Johansen-Berg, H. (2011). Network  
549 analysis detects changes in the contralesional hemisphere following stroke. *Neuroimage*, 54(1), 161–169. doi:  
550 10.1016/j.neuroimage.2010.08.032
- 551 Dennis, E., & Thompson, P. (2014). Functional brain connectivity using fmri in aging and alzheimer's disease. , 24.
- 552 Erdős, P., & Rényi, A. (1959). On random graphs i. *Publicationes Mathematicae (Debrecen)*, 6, 290-297.
- 553 Essen, D. C. V., Smith, S. M., Barch, D. M., Behrens, T. E., Yacoub, E., & Ugurbil, K. (2013). The wu-minn human  
554 connectome project: An overview. *NeuroImage*, 80, 62 - 79. Retrieved from  
555 <http://www.sciencedirect.com/science/article/pii/S1053811913005351> (Mapping the  
556 Connectome) doi: <https://doi.org/10.1016/j.neuroimage.2013.05.041>
- 557 Fornito, A., & Bullmore, E. T. (2015). Reconciling abnormalities of brain network structure and function in schizophrenia.  
558 *Current opinion in neurobiology*, 30, 44–50.
- 559 Fornito, A., Zalesky, A., & Bullmore, E. T. (Eds.). (2016). Chapter 1 - an introduction to brain networks. , 1 - 35. Retrieved  
560 from <http://www.sciencedirect.com/science/article/pii/B9780124079083000017> doi:  
561 <https://doi.org/10.1016/B978-0-12-407908-3.00001-7>
- 562 Fox, M. D., & Greicius, M. (2010). Clinical applications of resting state functional connectivity. *Frontiers in systems*  
563 *neuroscience*, 4, 19.

- 564 Friston, K. (2010). The free-energy principle: a unified brain theory? *Nature reviews. Neuroscience*, *11*(2), 127–138.
- 565 Giebel, H. (1971). Feature extraction and recognition of handwritten characters by homogeneous layers. In O.-J. Grüsser &  
566 R. Klinke (Eds.), *Zeichenerkennung durch biologische und technische systeme / pattern recognition in biological and*  
567 *technical systems* (pp. 162–169). Berlin, Heidelberg: Springer Berlin Heidelberg.
- 568 Glasser, M. F., Coalson, T. S., Robinson, E. C., Hacker, C. D., Harwell, J., Yacoub, E., . . . Van Essen, D. C. (2016). A  
569 multi-modal parcellation of human cerebral cortex. *Nature*, *536*, 171 EP -. Retrieved from  
570 <http://dx.doi.org/10.1038/nature18933>
- 571 Goñi, J., van den Heuvel, M. P., Avena-Koenigsberger, A., Velez de Mendizabal, N., Betzel, R. F., Griffa, A., . . . Sporns, O.  
572 (2014). Resting-brain functional connectivity predicted by analytic measures of network communication. *Proceedings of*  
573 *the National Academy of Sciences*, *111*(2), 833–838. Retrieved from  
574 <https://www.pnas.org/content/111/2/833> doi: 10.1073/pnas.1315529111
- 575 Gorgolewski, K., Durnez, J., & Poldrack, R. (2017). Preprocessed consortium for neuropsychiatric phenomics dataset [version  
576 1; referees: 2 approved with reservations]. *F1000Research*, *6*(1262). doi: 10.12688/f1000research.11964.1
- 577 Gorgolewski, K. J., Auer, T., Calhoun, V. D., Craddock, R. C., Das, S., Duff, E. P., . . . Poldrack, R. A. (2016). The brain  
578 imaging data structure, a format for organizing and describing outputs of neuroimaging experiments. *Sci Data*, *3*, 160044.  
579 doi: 10.1038/sdata.2016.44
- 580 Goulas, A., Schaefer, A., & Margulies, D. S. (2015). The strength of weak connections in the macaque cortico-cortical  
581 network. *Brain Struct Funct*, *220*(5), 2939–2951. doi: 10.1007/s00429-014-0836-3
- 582 Goñi, J., Avena-Koenigsberger, A., Velez de Mendizabal, N., van den Heuvel, M. P., Betzel, R. F., & Sporns, O. (2013).  
583 Exploring the morphospace of communication efficiency in complex networks. *PLOS ONE*, *8*(3), 1-10. Retrieved from  
584 <https://doi.org/10.1371/journal.pone.0058070> doi: 10.1371/journal.pone.0058070
- 585 Grayson, D. S., Bliss-Moreau, E., Machado, C. J., Bennett, J., Shen, K., Grant, K. A., . . . Amaral, D. G. (2016). The rhesus  
586 monkey connectome predicts disrupted functional networks resulting from pharmacogenetic inactivation of the amygdala.  
587 *Neuron*, *91*(2), 453–466. doi: 10.1016/j.neuron.2016.06.005
- 588 Greicius, M. D., Krasnow, B., Reiss, A. L., & Menon, V. (2003). Functional connectivity in the resting brain: A network  
589 analysis of the default mode hypothesis. *Proceedings of the National Academy of Sciences*, *100*(1), 253–258. Retrieved

590 from <http://www.pnas.org/content/100/1/253> doi: 10.1073/pnas.0135058100

591 Güçlü, U., & van Gerven, M. A. J. (2015). Deep neural networks reveal a gradient in the complexity of neural representations  
592 across the ventral stream. *Journal of Neuroscience*, 35(27), 10005–10014. Retrieved from

593 <http://www.jneurosci.org/content/35/27/10005> doi: 10.1523/JNEUROSCI.5023-14.2015

594 Hubel, D. H., & Wiesel, T. N. (1962). Receptive fields, binocular interaction and functional architecture in the cat's visual  
595 cortex. *J Physiol*, 160, 106–154.

596 Jenkinson, M., Beckmann, C. F., Behrens, T. E. J., Woolrich, M. W., & Smith, S. M. (2012). Fsl. *NeuroImage*, 62(2), 782–790.

597

598 Kell, A. J. E., Yamins, D. L. K., Shook, E. N., Norman-Haignere, S. V., & McDermott, J. H. (2018). A task-optimized neural  
599 network replicates human auditory behavior, predicts brain responses, and reveals a cortical processing hierarchy. *Neuron*,

600 98(3), 630–644.e16. Retrieved from <https://doi.org/10.1016/j.neuron.2018.03.044> doi:

601 10.1016/j.neuron.2018.03.044

602 Kelley, T. L. (1923). *Statistical method / by truman l. kelley* [Book]. The Macmillan Company New York.

603 Khaligh-Razavi, S.-M., & Kriegeskorte, N. (2014). Deep supervised, but not unsupervised, models may explain it cortical  
604 representation. *PLOS Computational Biology*, 10(11), 1-29. Retrieved from

605 <https://doi.org/10.1371/journal.pcbi.1003915> doi: 10.1371/journal.pcbi.1003915

606 Khambhati, A. N., Medaglia, J. D., Karuza, E. A., Thompson-Schill, S. L., & Bassett, D. S. (2018). Subgraphs of functional  
607 brain networks identify dynamical constraints of cognitive control. *PLOS Computational Biology*, 14(7), 1-33. Retrieved

608 from <https://doi.org/10.1371/journal.pcbi.1006234> doi: 10.1371/journal.pcbi.1006234

609 Kikuchi, Y., Horwitz, B., & Mishkin, M. (2010). Hierarchical auditory processing directed rostrally along the monkey's  
610 supratemporal plane. *J Neurosci*, 30(39), 13021–13030. doi: 10.1523/JNEUROSCI.2267-10.2010

611 Lambiotte, R., Delvenne, J., & Barahona, M. (2014). Random walks, markov processes and the multiscale modular  
612 organization of complex networks. *IEEE Transactions on Network Science and Engineering*, 1(2), 76-90. doi:

613 10.1109/TNSE.2015.2391998

614 Latora, V., & Marchiori, M. (2001). Efficient behavior of small-world networks. *Phys. Rev. Lett.*, 87, 198701. Retrieved from

615 <https://link.aps.org/doi/10.1103/PhysRevLett.87.198701> doi: 10.1103/PhysRevLett.87.198701

- 616 LeCun, Y., Bengio, Y., & Hinton, G. (2015). Deep learning. *Nature*, *521*, 436 EP -. Retrieved from  
617 <http://dx.doi.org/10.1038/nature14539>
- 618 Li, P., Fan, T.-T., Zhao, R.-J., Han, Y., Shi, L., Sun, H.-Q., ... Lu, L. (2017). Altered brain network connectivity as a potential  
619 endophenotype of schizophrenia. *Scientific Reports*, *7*(1), 5483. Retrieved from  
620 <https://doi.org/10.1038/s41598-017-05774-3> doi: 10.1038/s41598-017-05774-3
- 621 Lovász, L., & Simonovits, M. (1993). Random walks in a convex body and an improved volume algorithm. *Random*  
622 *Structures & Algorithms*, *4*(4), 359-412. Retrieved from  
623 <https://onlinelibrary.wiley.com/doi/abs/10.1002/rsa.3240040402> doi:  
624 10.1002/rsa.3240040402
- 625 Newman, M. E. J., & Girvan, M. (2004). Finding and evaluating community structure in networks. *Phys. Rev. E*, *69*, 026113.  
626 Retrieved from <https://link.aps.org/doi/10.1103/PhysRevE.69.026113> doi:  
627 10.1103/PhysRevE.69.026113
- 628 Norris, J. R. (1997). *Markov chains*. Cambridge University Press. doi: 10.1017/CBO9780511810633
- 629 Poldrack, R., Congdon, E., Triplett, W., Gorgolewski, K., Karlsgodt, K., Mumford, J., ... Bilder, R. (2016). A phenome-wide  
630 examination of neural and cognitive function. *bioRxiv*. Retrieved from  
631 <http://biorxiv.org/content/early/2016/06/19/059733> doi: 10.1101/059733
- 632 Raichle, M. E., MacLeod, A. M., Snyder, A. Z., Powers, W. J., Gusnard, D. A., & Shulman, G. L. (2001). A default mode of  
633 brain function. *Proceedings of the National Academy of Sciences*, *98*(2), 676–682. Retrieved from  
634 <http://www.pnas.org/content/98/2/676> doi: 10.1073/pnas.98.2.676
- 635 Reijneveld, J. C., Ponten, S. C., Berendse, H. W., & Stam, C. J. (2007). The application of graph theoretical analysis to  
636 complex networks in the brain. *Clinical Neurophysiology*, *118*(11), 2317 - 2331. Retrieved from  
637 <http://www.sciencedirect.com/science/article/pii/S1388245707004257> doi:  
638 <https://doi.org/10.1016/j.clinph.2007.08.010>
- 639 Rezaeinia, P., & Carter, R. M. (2017). Using hitting-time interdecile differences to identify brain networks with path-like  
640 features.
- 641 Rubinov, M., & Sporns, O. (2011). Weight-conserving characterization of complex functional brain networks. *NeuroImage*,

- 642 56(4), 2068 - 2079. Retrieved from  
643 <http://www.sciencedirect.com/science/article/pii/S105381191100348X> doi:  
644 <https://doi.org/10.1016/j.neuroimage.2011.03.069>
- 645 Satterthwaite, T. D., Elliott, M. A., Gerraty, R. T., Ruparel, K., Loughhead, J., Calkins, M. E., ... Wolf, D. H. (2013). An  
646 improved framework for confound regression and filtering for control of motion artifact in the preprocessing of resting-state  
647 functional connectivity data. *Neuroimage*, 64, 240–256. doi: 10.1016/j.neuroimage.2012.08.052
- 648 Sepulcre, J., Sabuncu, M. R., Yeo, T. B., Liu, H., & Johnson, K. A. (2012). Stepwise connectivity of the modal cortex reveals  
649 the multimodal organization of the human brain. *Journal of Neuroscience*, 32(31), 10649–10661. Retrieved from  
650 <http://www.jneurosci.org/content/32/31/10649> doi: 10.1523/JNEUROSCI.0759-12.2012
- 651 Shen, X., & Meyer, F. (2008). Low dimensional embedding of fmri datasets. , 41, 886-902.
- 652 Smith, S. M., Fox, P. T., Miller, K. L., Glahn, D. C., Fox, P. M., Mackay, C. E., ... Beckmann, C. F. (2009). Correspondence  
653 of the brain's functional architecture during activation and rest. *Proc Natl Acad Sci U S A*, 106(31), 13040–13045. doi:  
654 10.1073/pnas.0905267106
- 655 Smith, S. M., Jenkinson, M., Woolrich, M. W., Beckmann, C. F., Behrens, T. E. J., Johansen-Berg, H., ... Matthews, P. M.  
656 (2004). Advances in functional and structural mr image analysis and implementation as fsl. *Neuroimage*, 23 Suppl 1,  
657 S208-19. doi: 10.1016/j.neuroimage.2004.07.051
- 658 Smith, S. M., Miller, K. L., Salimi-Khorshidi, G., Webster, M., Beckmann, C. F., Nichols, T. E., ... Woolrich, M. W. (2011).  
659 Network modelling methods for fmri. *NeuroImage*, 54(2), 875 - 891. Retrieved from  
660 <http://www.sciencedirect.com/science/article/pii/S1053811910011602> doi:  
661 <https://doi.org/10.1016/j.neuroimage.2010.08.063>
- 662 Stiso, J., & Bassett, D. S. (2018). Spatial embedding imposes constraints on neuronal network architectures. *Trends in*  
663 *Cognitive Sciences*, 22(12), 1127 - 1142. Retrieved from  
664 <http://www.sciencedirect.com/science/article/pii/S1364661318302250> doi:  
665 <https://doi.org/10.1016/j.tics.2018.09.007>
- 666 Trujillo-Ortiz, A., & Hernandez-Walls, R. (2003). D'agostino-pearson's k2 test for assessing normality of data using skewness  
667 and kurtosis.

- 668 van den Heuvel, M. P., & Pol, H. E. H. (2010). Exploring the brain network: A review on resting-state fmri functional  
669 connectivity. *European Neuropsychopharmacology*, 20(8), 519 - 534. Retrieved from  
670 <http://www.sciencedirect.com/science/article/pii/S0924977X10000684> doi:  
671 <https://doi.org/10.1016/j.euroneuro.2010.03.008>
- 672 Van Essen, D. C., & Maunsell, J. H. R. (1983). Hierarchical organization and functional streams in the visual cortex. *Trends in*  
673 *neurosciences*, 6, 370–375.
- 674 Watts, D. J., & Strogatz, S. H. (1998). Collective dynamics of ‘small-world’ networks. *Nature*, 393, 440 EP -. Retrieved from  
675 <http://dx.doi.org/10.1038/30918>
- 676 Weber, B. J., & Huettel, S. A. (2008). The neural substrates of probabilistic and intertemporal decision making. *Brain Res*,  
677 1234, 104–115. doi: 10.1016/j.brainres.2008.07.105
- 678 Zalesky, A., Fornito, A., & Bullmore, E. T. (2010). Network-based statistic: Identifying differences in brain networks.  
679 *NeuroImage*, 53(4), 1197 - 1207. Retrieved from  
680 <http://www.sciencedirect.com/science/article/pii/S1053811910008852> doi:  
681 <https://doi.org/10.1016/j.neuroimage.2010.06.041>
